# Supplementary material for: Novel vanadium(iii) complexes with rigid phenylpolycarboxylate ligands: synthesis, structures and application in C–H bond activation
Source: Royal Society of Chemistry journal article supplement (doi:10.1039/c3dt32472a), 2013-01-01
Supplement: c3dt32472a.pdf [file c3dt32472a.pdf]

## Supplementary materials

# Novel vanadium (III) complexes with rigid phenylpolyboxylate ligands: synthesis, structures and application in C-H bond activation

*Dong Xue Ren, Na Xing, Hui Shan, Chen Chen, Yun Zhu Cao, Yong Heng Xing\**

*College of Chemistry and Chemical engineering, Liaoning Normal University, Huanghe Road 850<sup>#</sup>,*

*Dalian City, 116029, P. R. China.*

\*Corresponding author: E-mail: [xingyongheng2000@163.com](mailto:xingyongheng2000@163.com)

**Table S1** Characteristic IR bands ( $\text{cm}^{-1}$ ) for the complexes **1** and **2**.

| Complexes                       | <b>1</b>   | <b>2</b>   |
|---------------------------------|------------|------------|
| $\nu(\text{O-H})$               | 3292, 3467 | 3257, 3439 |
| $\nu(=\text{C-H})$              | 3056, 3075 | 3060       |
| $\nu_{\text{as}}(\text{COO}^-)$ | 1652       | 1672       |
| $\nu_{\text{s}}(\text{COO}^-)$  | 1395       | 1379       |
| $\nu(\text{V-OH}_2\text{O})$    | 512        | 539        |
| $\nu(\text{V-Ocarboxyl})$       | 475        | 491        |
| $\nu(\text{V-N})$               | 449        | 455        |

**Table S2** Characteristic UV-Vis bands (nm) for the complexes **1** and **2**

| Complexes | $\pi-\pi^*$ transition | LMCT | d-d transition |
|-----------|------------------------|------|----------------|
| <b>1</b>  | 262                    | 420  | 742, 1040      |
| <b>2</b>  | 268                    | 456  | 742, 1100      |

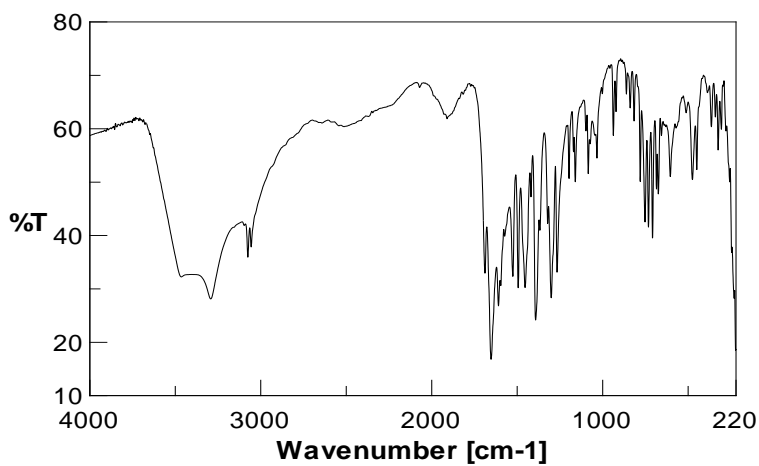

**Fig. S1** The IR spectra of the complex **1**

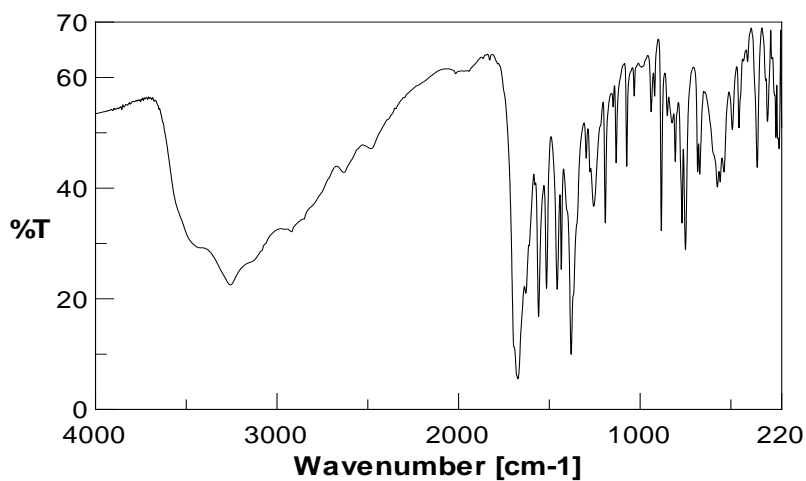

**Fig. S2** The IR spectra of the complex **2**

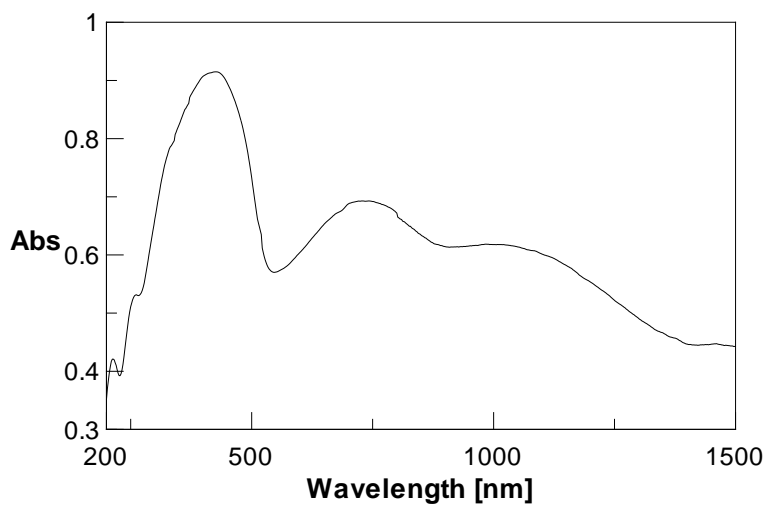

**Fig. S3** The UV-Vis spectra for the complex 1

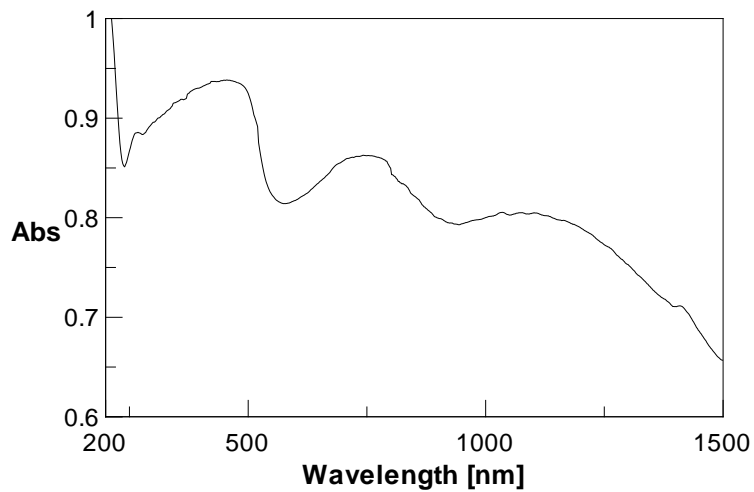

**Fig. S4** The UV-Vis spectra for the complex 2

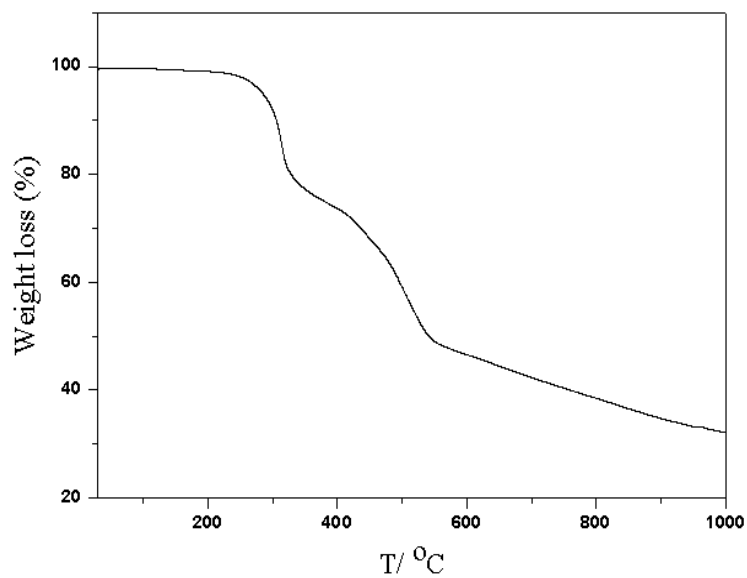

**Fig. S5** TG curve of the complex 1.

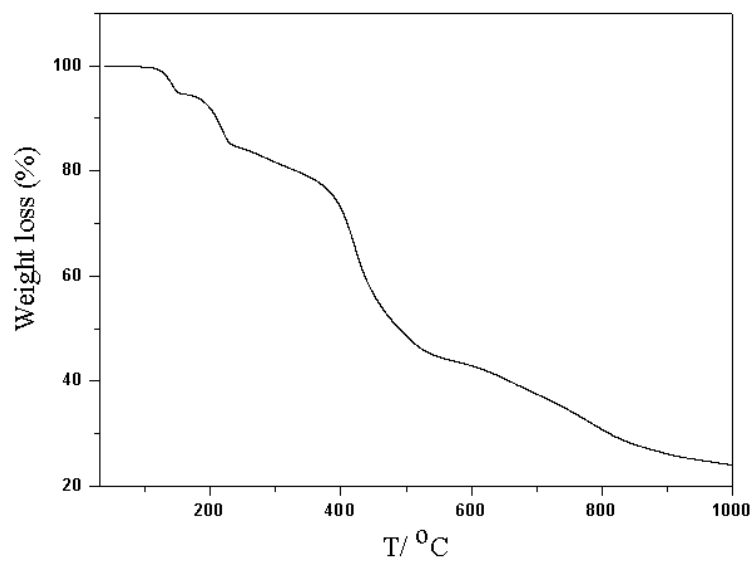

**Fig. S6** TG curve of the complex 2.

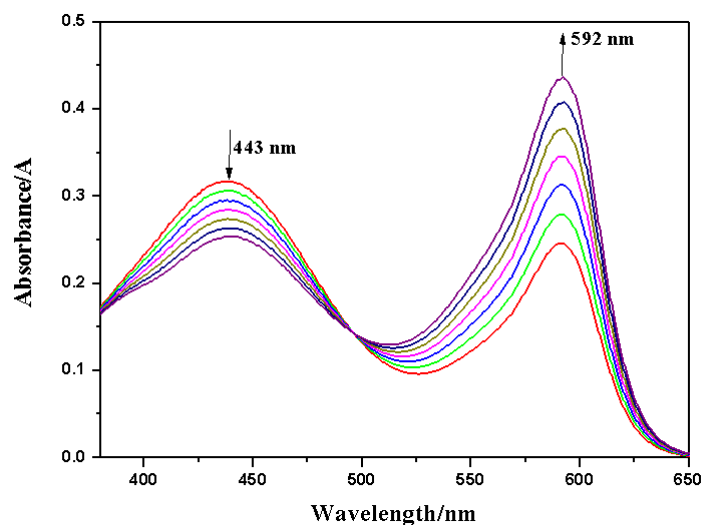

**Fig. S7** Oxidative bromination of phenol red catalyzed by the complex **1**. Spectral changes at 10 min intervals,  $c(\text{phosphate buffer}) = 50 \text{ mmol/L}$ ,  $\text{pH} = 5.8$ ,  $c(\text{KBr}) = 0.4 \text{ mol/L}$ ,  $c(\text{phenol red}) = 10^{-4} \text{ mol/L}$ .

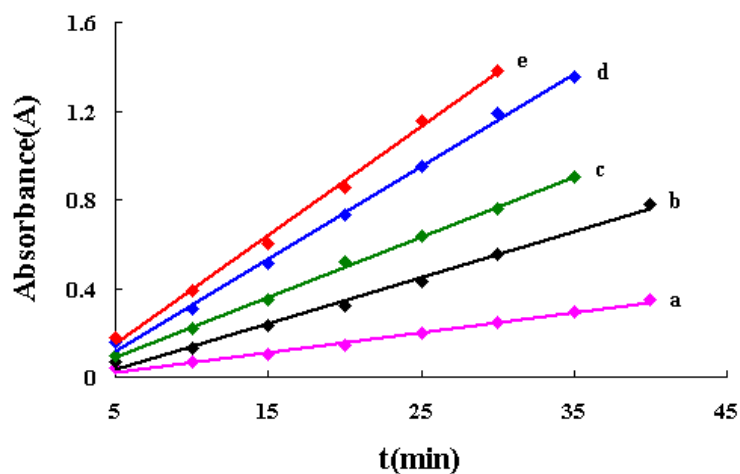

**Fig. S8** The measurable absorbance dependence of time for the complex **1**. Conditions used:  $\text{pH} = 5.8$ ,  $c(\text{KBr}) = 0.4 \text{ mol/L}$ ,  $c(\text{H}_2\text{O}_2) = 1 \text{ mmol/L}$ ,  $c(\text{phenol red}) = 10^{-4} \text{ mol/L}$ .  $c(\text{complex } \mathbf{1}/\text{mmol/L}) = \text{a: } 2.3011 \times 10^{-5}$ ;  $\text{b: } 4.602 \times 10^{-5}$ ;  $\text{c: } 6.9032 \times 10^{-5}$ ;  $\text{d: } 9.2042 \times 10^{-5}$ ;  $\text{e: } 1.1505 \times 10^{-4}$ .

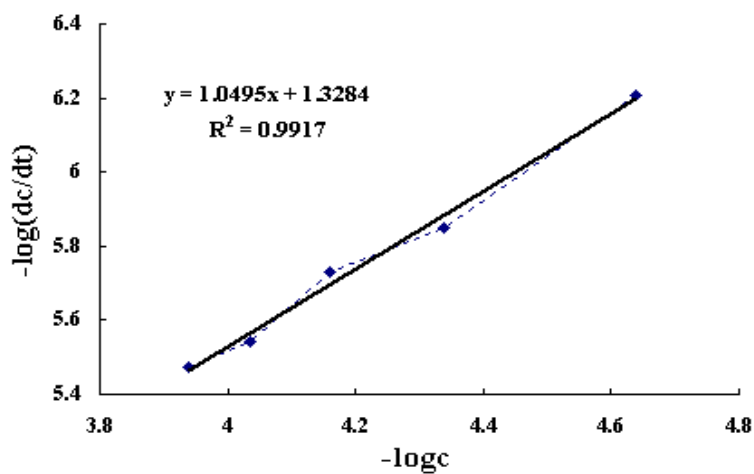

**Fig. S9**  $-\log(dC/dt)$  dependence of  $-\log c$  for complex **1** in DMF–H<sub>2</sub>O at  $30 \pm 0.5$  °C ( $c$  is the concentration of the oxidovanadium complex **1**; Conditions used:  $c(\text{phosphate buffer}) = 50$  mmol/L,  $\text{pH} = 5.8$ ,  $c(\text{KBr}) = 0.4$  mol/L,  $c(\text{phenol red}) = 10^{-4}$  mol/L).
